# Supplementary material for: Ravens notice dominance reversals among conspecifics within and outside their social group
Source: PubMed Central journal article supplement — Nat Commun. 2014 Apr 22;5:3679. doi: 10.1038/ncomms4679 (PMC3997804; doi:10.1038/ncomms4679), 2014-04-22
Supplement: ncomms4679-s1.pdf [file ncomms4679-s1.pdf]

### Supplementary figures:

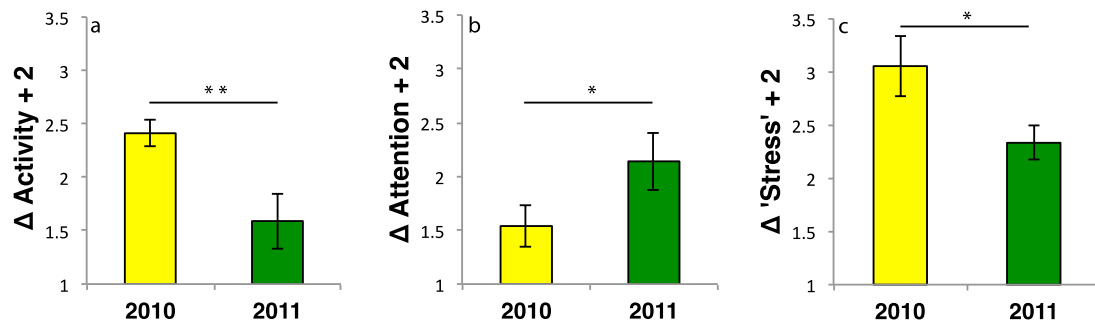

**Supplementary Figure 1: Activity, Attention and 'Stress' behaviors of 2010 and 2011 ravens in response to in-group stimuli.**

Mean ± SEM difference between play-back and baseline ( $\Delta$ ) of **a.** Activity, **b.** Attention, and **c.** 'Stress', for individuals born in 2010 ( $n = 10$ ; yellow bars) for individuals born in 2011 ( $n = 6$ ; green bars). GLMM: \*  $P < 0.05$ ; \*\*  $P < 0.01$ .

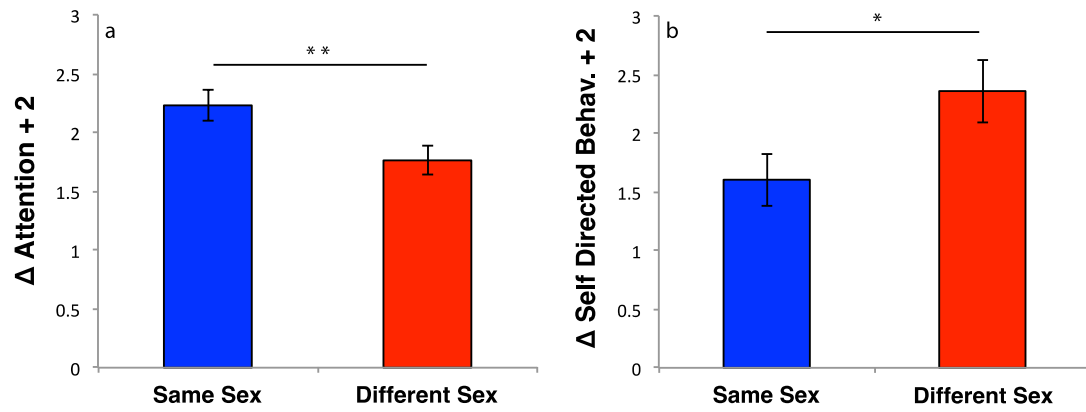

**Supplementary Figure 2: Attention and Self-directed behaviors of out-group stimuli of same and different sexed ravens.**

Mean ± SEM difference between play-back and baseline ( $\Delta$ ) of **a.** Activity, and **b.** Self Directed Behavior, for playbacks of individuals of the same sex (blue bars) and of individuals of the different sex (red bars). \*  $P < 0.05$ ; \*\*  $P < 0.01$ .

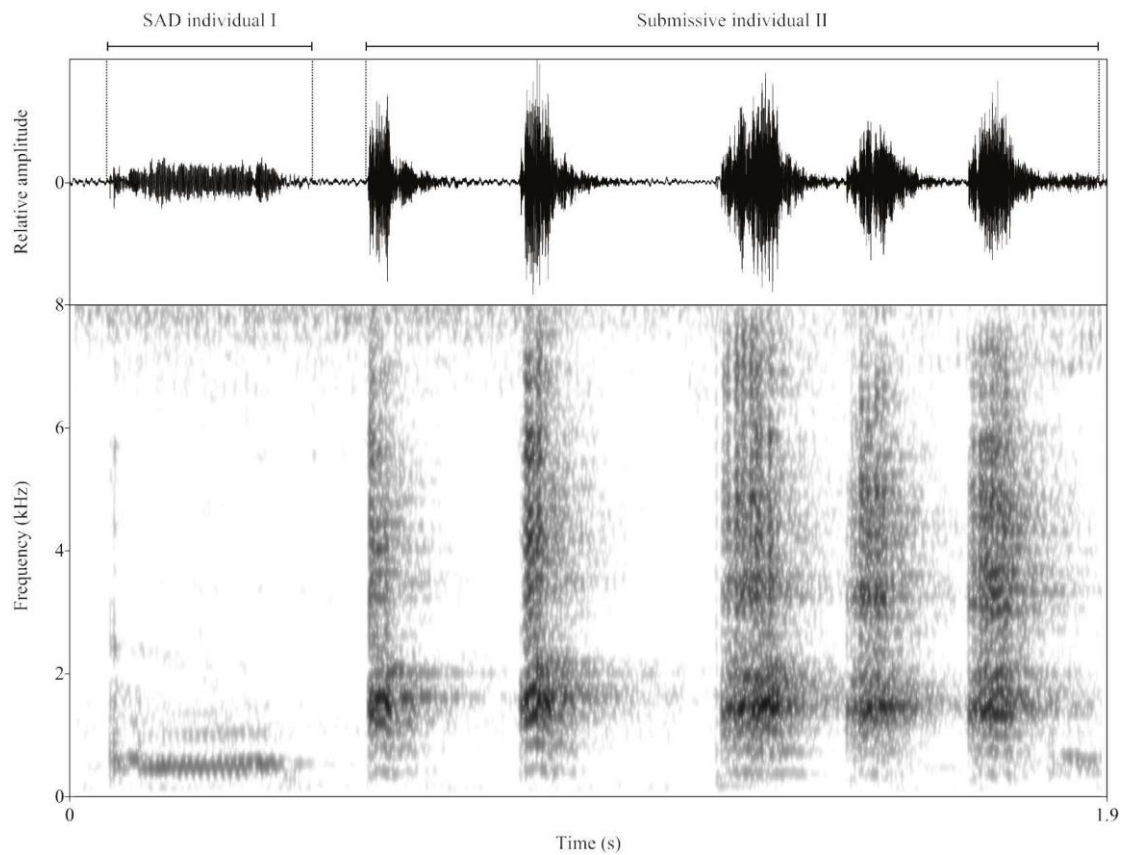

**Supplementary Figure 3: Example of a vocal interaction between a dominant bird (individual I) giving a SAD and a subordinate bird (individual II) responding with a bout of submissive vocalizations.**

Vocalizations represented with a corresponding waveform and a spectrogram. (Spectrogram settings: fast Fourier transform, Gaussian window shape, window length 0.001 s, dynamic range 50 dB)

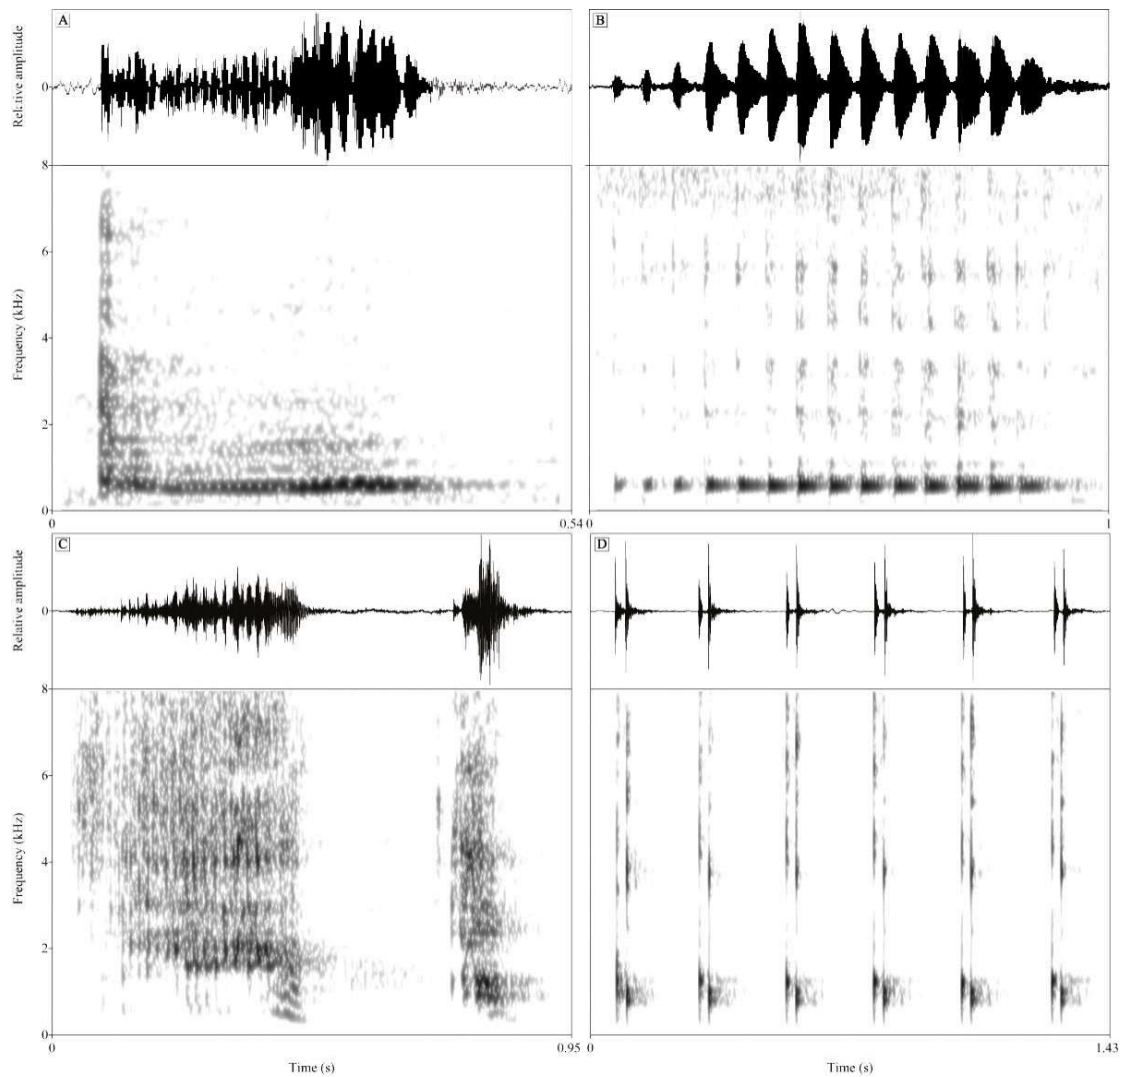

**Supplementary Figure 4: Example of the four acoustically distinct SAD types used in the playback stimuli.**

Each vocalization represented with their corresponding waveform and a spectrogram. A) Was the predominant call of one male and three females from group 1, B) was the predominant call of two males from group 1, C) was the predominant call of three males and one female from group 2, D) was the predominant call of two females from group 2. Time axis is adjusted for each call individually for better presentation. (Spectrogram settings: fast Fourier transform, Gaussian window shape, window length 0.001 s, dynamic range 40 dB)

## Supplementary tables:

**Supplementary table 1: Information on each subject and its models.**

| Group | a. Individual Information |     |      |       |      | b. Models for playback |       |       |       |
|-------|---------------------------|-----|------|-------|------|------------------------|-------|-------|-------|
|       | Name (abb.)               | Sex | Year | Upbr. | Rank | FaSs                   | FaDs  | UfSs  | UfDs  |
| 1     | Anton (An)                | ♂   | 2010 | PR    | 1    | Jk-Js                  | So-Kl | Ry-Mt | As-Jo |
|       | Jakob (Jk)                | ♂   | 2010 | PR    | 2    | An-Js*                 | Le-Kl | Or-Mt | As-Jo |
|       | Jonas (Js)                | ♂   | 2010 | PR    | 3    | An-Jk                  | Le-Kl | Ry-Mt | As-Ln |
|       | Heidi (He)                | ♀   | 2010 | PR    | 4    | Le-Kl                  | Jk-Js | As-Jo | Or-Mt |
|       | Lena (Le)                 | ♀   | 2010 | PR    | 5    | So-Kl                  | An-Js | Ln-Jo | Ry-Mt |
|       | Sophie (So)               | ♀   | 2010 | PR    | 6    | Le-Kl*                 | An-Js | As-Ln | Ry-Mt |
|       | Klara (Kl)                | ♀   | 2010 | PR    | 7    | Le-So                  | An-Js | As-Jo | Ry-Or |
|       | Elen (El)                 | ♀   | 2010 | PR    | 8    | Le-So                  | An-Jk | As-Ln | Ry-Or |
| 2     | Thor (Th)                 | ♂   | 2011 | PR    | 1    | Ry-Mt                  | As-Ln | An-Js | So-Kl |
|       | Ray (Ry)                  | ♂   | 2011 | HR    | 2    | Or-Mt                  | Ln-Jo | Jk-Js | Le-Kl |
|       | Orm (Or)                  | ♂   | 2011 | HR    | 3    | Ry-Mt*                 | As-Jo | An-Jk | Le-Kl |
|       | Matte (Mt)                | ♂   | 2011 | HR    | 4    | Ry-Or                  | As-Jo | An-Js | Le-So |
|       | Astrid (As)               | ♀   | 2010 | HR    | 5    | Ln-Jo                  | Ry-Mt | Le-So | An-Js |
|       | Lellan (Ln)               | ♀   | 2011 | HR    | 6    | As-Jo*                 | Ry-Or | So-Kl | An-Js |
|       | Joey (Jo)                 | ♀   | 2010 | HR    | 7    | As-Ln                  | Ry-Mt | Le-Kl | Jk-Js |
|       | Skadi (Sk)                | ♀   | 2011 | PR    | 8    | As-Jo                  | Or-Mt | Le-Kl | An-Jk |

**a)** Name (abb.), sex, year of birth, way of upbringing (PR: parent-raised; HR: hand-raised) and dominance rank of each individual and the group in which it resided; **b)** Abbreviations of the names of the Familiar- Same sex (FaxSs) models, Familiar-Different sex (FaDs) models, Unfamiliar- Same sex (UfSs) models, and Unfamiliar-Different sex (UfDs) models.\* refers to dyads in which the focal subject was ranking in between the two played back individuals.

**Supplementary table 2: Schematic representation of all conditions**

|                  | <b>Same Sex</b> | <b>Different Sex</b> |
|------------------|-----------------|----------------------|
| <b>In-group</b>  | Expected        | Expected             |
|                  | Unexpected      | Unexpected           |
| <b>Out-group</b> | Expected        | Expected             |
|                  | Unexpected      | Unexpected           |

**Supplementary table 3: Individuals and their corresponding predominant SAD types that were used to construct the stimuli.**

| Group | ID | Sex | SAD type |
|-------|----|-----|----------|
| 1     | An | M   | A        |
| 1     | Jk | M   | B        |
| 1     | Jn | M   | B        |
| 1     | Ln | F   | A        |
| 1     | Sf | F   | A        |
| 1     | Kl | F   | A        |
| 2     | Ry | M   | C        |
| 2     | Or | M   | C        |
| 2     | Mt | M   | C        |
| 2     | As | F   | D        |
| 2     | Ll | F   | C        |
| 2     | Jy | F   | D        |

**Supplementary table 4: Component Matrix**

|                                       | Component     |               |              |              |              |
|---------------------------------------|---------------|---------------|--------------|--------------|--------------|
|                                       | 1             | 2             | 3            | 4            | 5            |
| Self Assurance Display                |               | <b>0.427</b>  | 0.342        | 0.250        |              |
| Loud-call                             |               | <b>0.501</b>  |              |              |              |
| Soft-call                             |               | <b>0.472</b>  |              |              |              |
| Singing duration                      |               |               | -0.268       | -0.226       |              |
| Beak wipe                             |               | 0.210         |              | 0.303        | <b>0.533</b> |
| Scratch                               | -0.275        | -0.229        | 0.305        | <b>0.599</b> |              |
| Branch-hop                            | <b>0.498</b>  | -0.209        |              |              | <b>0.593</b> |
| Head turn                             |               | -0.201        | <b>0.579</b> | -0.279       | 0.218        |
| Stretch                               |               |               |              | <b>0.534</b> |              |
| Wall/Structure peck                   |               | <b>0.405</b>  |              | 0.327        | <b>0.411</b> |
| Body shake                            | -0.298        | <b>-0.550</b> | -0.211       | 0.264        |              |
| Auto-preen duration                   | -0.384        | <b>-0.519</b> |              | 0.327        |              |
| Flying duration                       | 0.236         | -0.373        |              | -0.325       | <b>0.527</b> |
| Walking duration                      | <b>0.795</b>  |               |              |              |              |
| Resting duration                      | <b>-0.891</b> |               | -0.273       |              |              |
| Freeze duration                       |               |               | <b>0.806</b> |              |              |
| Manipulation of objects/food duration | <b>0.813</b>  |               |              | 0.233        | -0.356       |
| Eigenvalue                            | 2.810         | 1.881         | 1.521        | 1.447        | 1.386        |
| % of variance explained               | 16.532        | 11.064        | 8.948        | 8.687        | 8.154        |

Loadings of the original variables on the different components are shown. Loadings below  $\pm 0.2$  are omitted, and loadings exceeding  $\pm 0.4$  are in bold font.
